# Supplementary material for: Colorimetric detection of Escherichia coli O157:H7 using functionalized Au@Pt nanoparticles as peroxidase mimetics
Source: Royal Society of Chemistry journal article supplement (doi:10.1039/c3an00026e), 2013-01-01
Supplement: c3an00026e.pdf [file c3an00026e.pdf]

## Supporting Information

### Colorimetric detection of *Escherichia coli* O157:H7 using functionalized Au@Pt nanoparticles as peroxidase mimetics

Haichao Su<sup>a1</sup>, Han Zhao<sup>b1</sup>, Fengmin Qiao<sup>a</sup>, Lijian Chen<sup>a</sup>, Ruihuan Duan<sup>a</sup>, Shiyun Ai<sup>a\*</sup>

<sup>a</sup>College of Chemistry and Material Science, Shandong Agricultural University, Taian,

271018, Shandong, China

<sup>b</sup>Weifang Entry-Exit Inspection and Quarantine Bureau of the People's Republic of

China, Weifang, 261041, Shandong, China

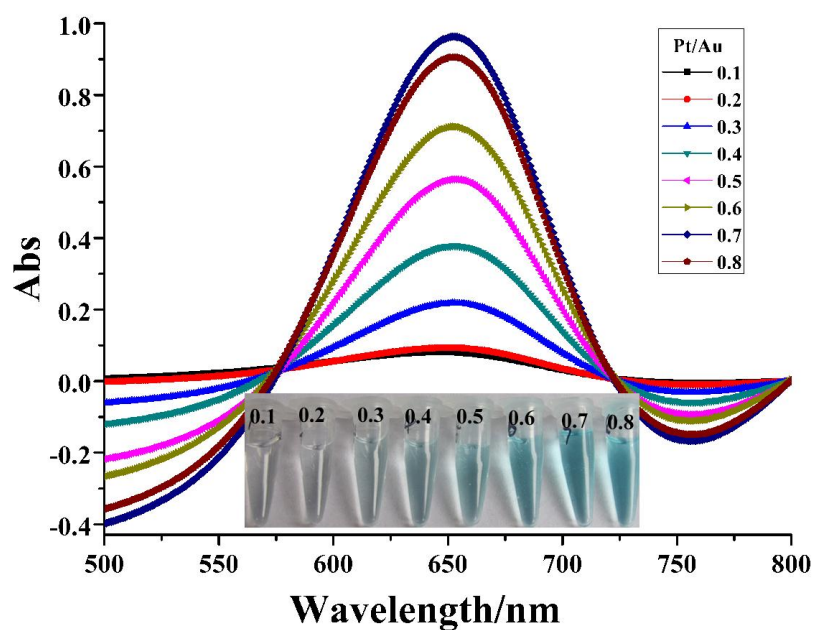

**Fig. 1S** UV-vis absorption spectra change for the TMB oxidation by Au@Pt NPs with various Pt/Au molar ratios. (Inset: color evolution of TMB oxidation in the presence of H<sub>2</sub>O<sub>2</sub> under the catalysis of Au@Pt with various Pt/Au molar ratios (from left to right: 0.1, 0.2, 0.3, 0.4, 0.5, 0.6, 0.7, 0.8). Experiments were carried out in PBS (pH 5)

containing 10  $\mu\text{L}$  Au@Pt NPs, 10 mM  $\text{H}_2\text{O}_2$ , and 0.08 mM TMB. The photos were taken at 5 min after adding Au@Pt.

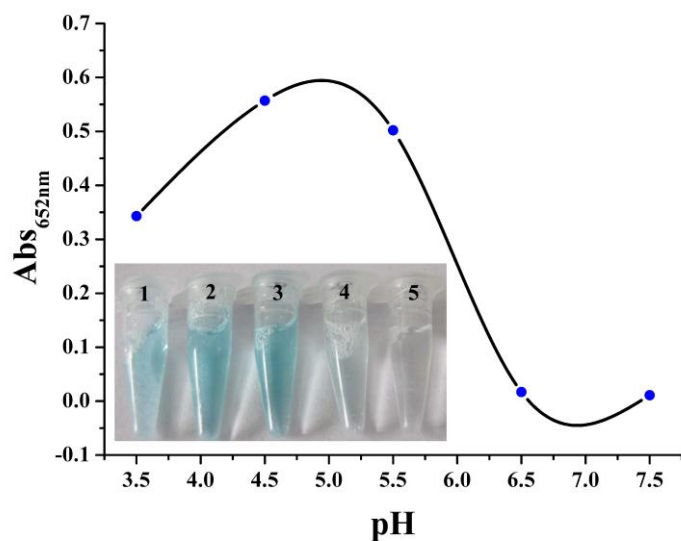

**Fig. 2S** Effects of media pH on the catalytic activities for TMB oxidation catalyzed by Au@Pt. (Inset: the corresponding photographs). The experimental conditions were the same.

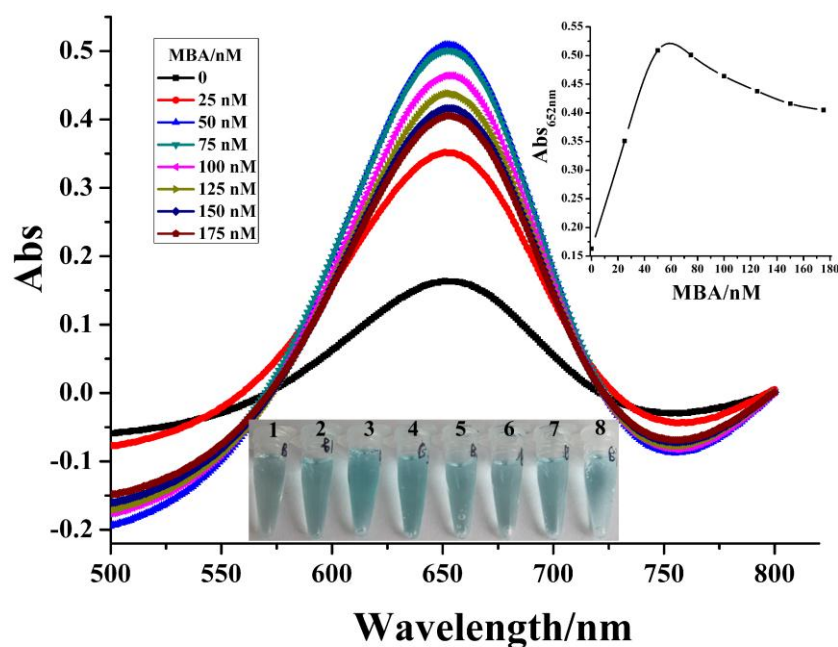

**Fig. 3S** TMB oxidation catalyzed by Au@Pt capped with different concentrations of 4-mercaptophenylboronic acid.
